# Supplementary material for: Tactile display of softness on fingertip
Source: PubMed Central journal article supplement (PMC7686500; doi:10.1038/s41598-020-77591-0), 2020-11-24

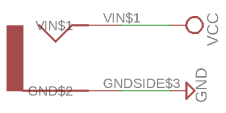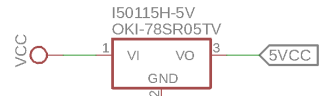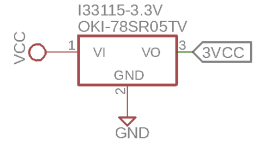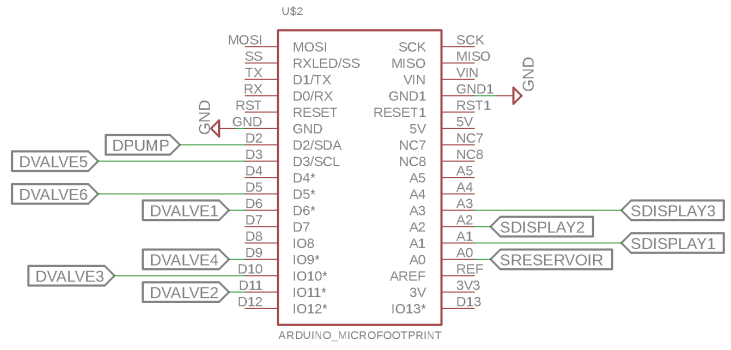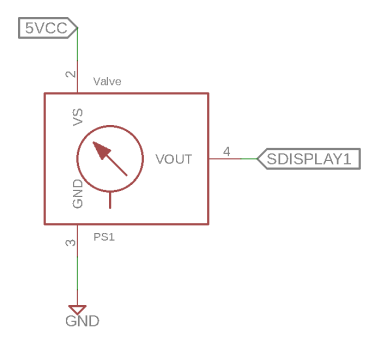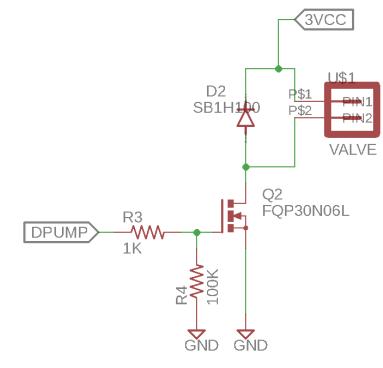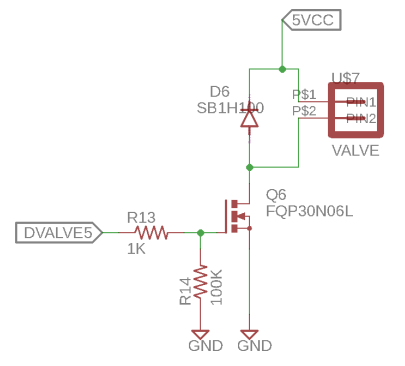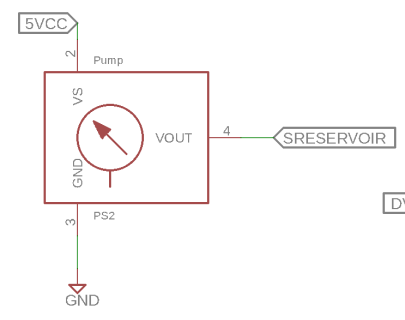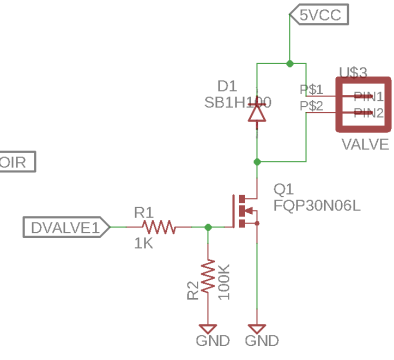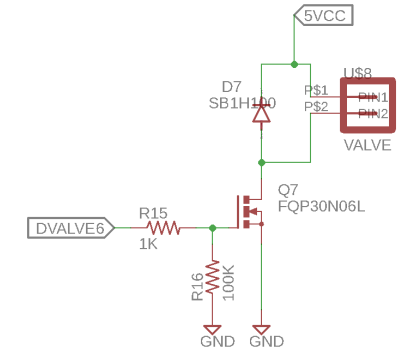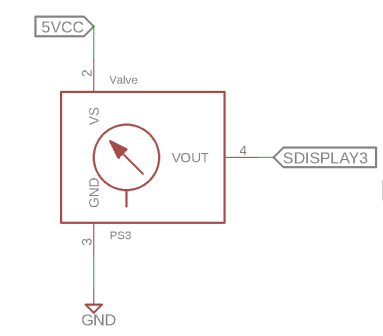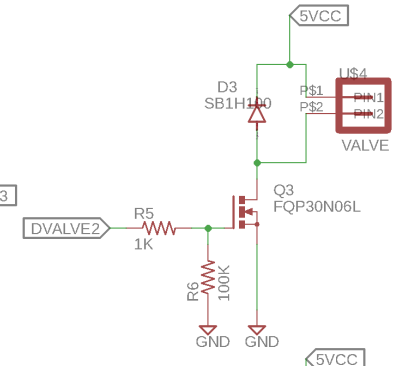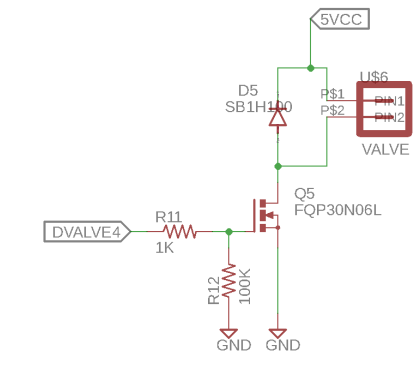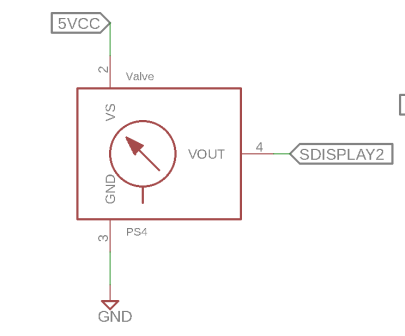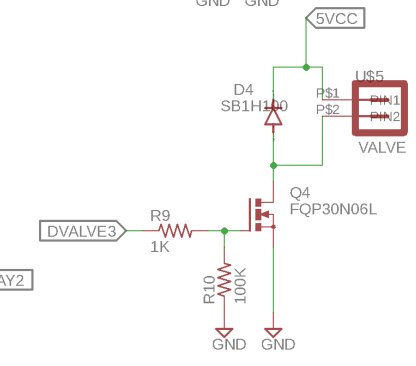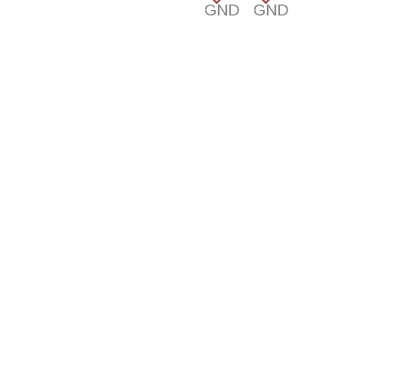

Supplement: 41598_2020_77591_MOESM2_ESM.pdf [file 41598_2020_77591_MOESM2_ESM.pdf]
